# Supplementary material for: Racial Differences in the Human Endogenous Circadian Period
Source: PubMed Central journal article supplement (PMC2699031; doi:10.1371/journal.pone.0006014), 2009-06-30

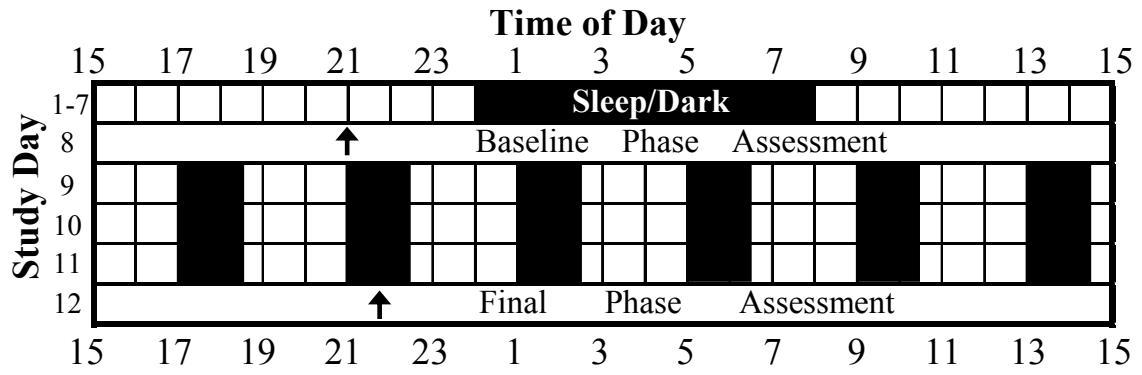

Supplement: pone.0006014.s001.pdf [file pone.0006014.s001.pdf]
